# Supplementary material
Source: PubMed Central journal article supplement (PMC6366331)
Supplement: NIHMS1515534-supplement-1.pdf [file NIHMS1515534-supplement-1.pdf]

904 **Supplementary Information Figure 1.** Method of generating the annual AVHRR vegetation  
 905 continuous fields (VCF) land-cover product. **a**, Flowchart. **b**, Annual metrics derived from  
 906 monthly composites.

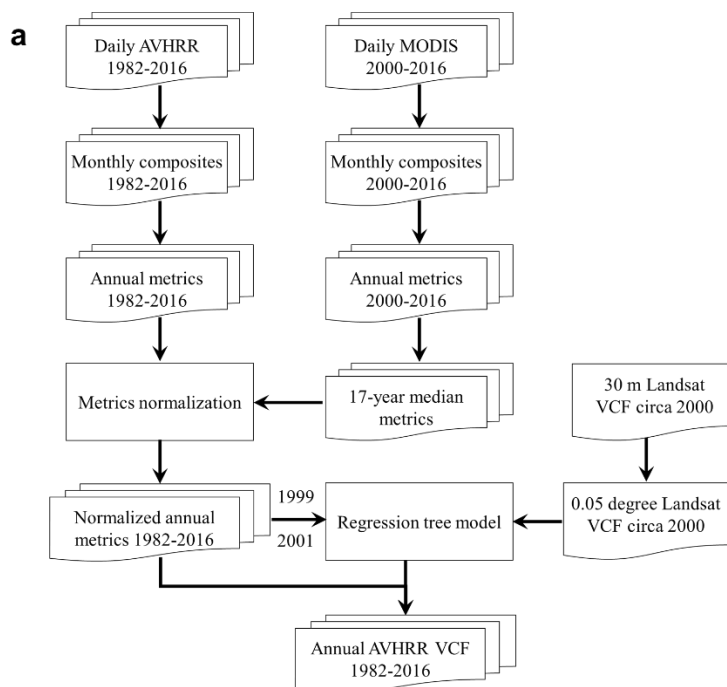

**b**

| Metric type                                 | Statistical transformation                                                                                                                 | N   |
|---------------------------------------------|--------------------------------------------------------------------------------------------------------------------------------------------|-----|
| Individual band- or index-based metrics     | Percentile (0, 10, 25, 50, 75, 90 and 100) values of channels 1-5 and NDVI.                                                                | 42  |
|                                             | Mean and standard derivation of all observations between any two percentiles of channels 1-5 and NDVI.                                     | 252 |
| Interaction metrics of two bands or indices | Channels 1-5 corresponding to percentiles of NDVI.                                                                                         | 35  |
|                                             | Channels 1-3 and NDVI corresponding to percentiles of channel 4 brightness temperature.                                                    | 28  |
|                                             | Mean and standard derivation of all observations of channels 1-5 between any two percentiles of NDVI.                                      | 210 |
|                                             | Mean and standard derivation of all observations of channels 1-3 and NDVI between any two percentiles of channel 4 brightness temperature. | 168 |

907

908

909 **Supplementary Information Table 1.** Estimates of 1982 land cover area, 1982-2016 annual net  
 910 land-cover change and 1982-2016 gross land-cover change at national scale. Consistent with  
 911 Extended Data Tables 1 and 2, annual net land-cover change (slope) and 1982 land-cover area  
 912 were estimated using Theil-Sen regression of time series of annual land-cover area per country.  
 913 Lower and upper slopes represent the 90% confidence interval. Reported p-value is for the  
 914 Mann-Kendall test for trend. Gross land-cover change was estimated based on per-pixel non-

915 parametric trend analysis. Per-pixel loss and gain were summed to derive gross loss and gain at  
 916 the aggregated scale. Country boundary shapefile was downloaded from Global Administrative  
 917 Areas (GADM) (<http://www.gadm.org>). Only countries with land area greater than 10<sup>5</sup> km<sup>2</sup> are  
 918 included.

| Country                          | Tree canopy cover |            |            |            |       |           | Short vegetation cover |           |            |            |            |       | Bare ground cover |           |           |            |            |            |              |           |           |                       |                       |                       |
|----------------------------------|-------------------|------------|------------|------------|-------|-----------|------------------------|-----------|------------|------------|------------|-------|-------------------|-----------|-----------|------------|------------|------------|--------------|-----------|-----------|-----------------------|-----------------------|-----------------------|
|                                  | Annual net change |            |            |            |       |           | Gross change           |           |            |            |            |       | Annual net change |           |           |            |            |            | Gross change |           |           |                       |                       |                       |
|                                  | Area (B2)         | Slope (B2) | Lower (B2) | Upper (B2) | p     | Loss (B2) | Gain (B2)              | Area (B2) | Slope (B2) | Lower (B2) | Upper (B2) | p     | Loss (B2)         | Gain (B2) | Area (B2) | Slope (B2) | Lower (B2) | Upper (B2) | p            | Loss (B2) | Gain (B2) |                       |                       |                       |
|                                  |                   |            |            |            |       |           |                        |           |            |            |            |       |                   |           |           |            |            |            |              |           |           | (B2/km <sup>2</sup> ) | (B2/km <sup>2</sup> ) | (B2/km <sup>2</sup> ) |
| Afghanistan                      | 2                 | 0.0        | 0.0        | 0.0        | 0.000 | -1        | 0                      | 289       | -1.1       | -1.6       | -0.6       | 0.000 | -34               | 4         | 451       | 1.2        | 0.6        | 1.7        | 0.000        | -4        | 35        |                       |                       |                       |
| Algeria                          | 8                 | 0.0        | 0.0        | 0.1        | 0.023 | 0         | 2                      | 850       | 0.0        | -0.4       | 0.5        | 0.930 | -6                | 7         | 2566      | -0.1       | -0.6       | 0.3        | 0.755        | -7        | 5         |                       |                       |                       |
| Angola                           | 390               | -1.1       | -2.1       | -0.2       | 0.044 | -34       | 8                      | 776       | 1.3        | 0.4        | 2.3        | 0.023 | -5                | 34        | 84        | -0.1       | -0.4       | 0.2        | 0.733        | -5        | 3         |                       |                       |                       |
| Argentina                        | 456               | -3.3       | -5.5       | -1.2       | 0.011 | -84       | 8                      | 1545      | 0.9        | -0.4       | 2.4        | 0.233 | -51               | 87        | 732       | 2.7        | 0.6        | 5.1        | 0.029        | -9        | 61        |                       |                       |                       |
| Australia                        | 459               | -0.6       | -2.2       | 0.7        | 0.532 | -38       | 29                     | 4452      | -4.1       | -0.7       | 4.1        | 0.379 | -0.6              | 48        | 2764      | 5.2        | -4.0       | 2.5        | 0.280        | -34       | 10        |                       |                       |                       |
| Bangladesh                       | 39                | 0.2        | 0.1        | 0.3        | 0.000 | 0         | 6                      | 301       | 0.1        | 0.0        | 0.1        | 0.088 | -2                | 3         | 20        | -0.3       | -0.3       | -0.2       | 0.000        | -8        | 1         |                       |                       |                       |
| Belarus                          | 60                | 1.1        | 0.8        | 1.3        | 0.000 | 0         | 32                     | 30        | -1.0       | -1.3       | -0.8       | 0.000 | -30               | 0         | 5         | -0.1       | -0.1       | -0.1       | 0.000        | -1        | 0         |                       |                       |                       |
| Benin                            | 12                | 0.1        | 0.0        | 0.2        | 0.008 | 0         | 3                      | 94        | -0.1       | -0.1       | 0.0        | 0.005 | -2                | 0         | 9         | 0.0        | 0.0        | 0.0        | 0.478        | -1        | 0         |                       |                       |                       |
| Bolivia                          | 587               | -1.3       | -1.9       | -0.7       | 0.001 | -43       | 8                      | 348       | 1.5        | 0.9        | 2.1        | 0.000 | -10               | 47        | 166       | -0.1       | -0.3       | 0.2        | 0.570        | -7        | 4         |                       |                       |                       |
| Botswana                         | 23                | 0.0        | -0.1       | 0.1        | 0.650 | -1        | 2                      | 390       | 0.6        | -0.3       | 1.7        | 0.307 | -1                | 8         | 176       | -0.6       | -1.7       | 0.5        | 0.334        | -9        | 1         |                       |                       |                       |
| Brazil                           | 4856              | -1.3       | -6.0       | -8.1       | 0.000 | -399      | 70                     | 3400      | 1.6        | 7.6        | 16.1       | 0.000 | -63               | 395       | 212       | 0.1        | -0.4       | 0.7        | 0.712        | -9        | 28        |                       |                       |                       |
| Bulgaria                         | 26                | 0.5        | 0.4        | 0.6        | 0.000 | 0         | 13                     | 79        | -0.4       | -0.5       | -0.3       | 0.000 | -11               | 0         | 6         | -0.1       | -0.1       | -0.1       | 0.000        | -2        | 0         |                       |                       |                       |
| Burkina Faso                     | 5                 | 0.0        | 0.0        | 0.1        | 0.061 | 0         | 1                      | 86        | 0.3        | 0.0        | 0.5        | 0.201 | -1                | 10        | 85        | -0.3       | -0.6       | 0.0        | 0.083        | -11       | 1         |                       |                       |                       |
| Cambodia                         | 74                | -0.2       | -0.4       | 0.0        | 0.140 | -2        | 10                     | 94        | 0.2        | 0.0        | 0.4        | 0.125 | -9                | 2         | 8         | 0.0        | 0.0        | 0.0        | 0.755        | -1        | 0         |                       |                       |                       |
| Cameroon                         | 222               | 0.7        | 0.4        | 0.9        | 0.000 | -8        | 2                      | 226       | -0.5       | -0.8       | -0.2       | 0.008 | -2                | 8         | 38        | -0.1       | -0.2       | -0.1       | 0.000        | -2        | 1         |                       |                       |                       |
| Canada                           | 3025              | 2.1        | -2.7       | 6.6        | 0.478 | -1        | 8                      | 5544      | 1.3        | -3.7       | -6.6       | 0.550 | -3                | 120       | -3.5      | -4.5       | 2.8        | 0.000      | -3           | 0         |           |                       |                       |                       |
| Central African Republic         | 234               | 1.7        | 1.2        | 2.1        | 0.000 | -122      | 57                     | 379       | -1.5       | -1.9       | -1.1       | 0.000 | -122              | 53        | 11        | -0.1       | -0.2       | -0.1       | 0.000        | -72       | 10        |                       |                       |                       |
| Chad                             | 22                | 0.3        | 0.2        | 0.4        | 0.000 | 0         | 48                     | 372       | 1.2        | 0.6        | 1.8        | 0.002 | -4                | 0         | 880       | -1.5       | -2.2       | -0.8       | 0.002        | -2        | 0         |                       |                       |                       |
| Chile                            | 258               | 0.6        | 0.4        | 0.8        | 0.000 | 0         | 8                      | 311       | -0.8       | -1.2       | -0.4       | 0.002 | -5                | 39        | 297       | 0.3        | -0.1       | 0.6        | 0.347        | -42       | 1         |                       |                       |                       |
| China                            | 3779              | 10.7       | 7.8        | 12.2       | 0.000 | -5        | 23                     | 4613      | -3.1       | -5.1       | -1.2       | 0.006 | -30               | 9         | 3625      | -7.3       | -9.5       | -5.1       | 0.000        | -8        | 3         |                       |                       |                       |
| Colombia                         | 707               | 10         | 0.5        | 15         | 0.002 | -16       | 324                    | 393       | -0.8       | -1.2       | -0.4       | 0.005 | -330              | 224       | 45        | -0.2       | -0.3       | -0.2       | 0.000        | -286      | 78        |                       |                       |                       |
| Côte d'Ivoire                    | 300               | 0.3        | 0.1        | 0.5        | 0.011 | -5        | 33                     | 209       | -0.3       | -0.5       | -0.1       | 0.025 | -29               | 7         | 13        | 0.0        | -0.1       | 0.0        | 0.340        | -5        | 1         |                       |                       |                       |
| Cuba                             | 24                | 0.5        | 0.5        | 0.6        | 0.000 | 0         | 8                      | 80        | -0.5       | -0.5       | -0.4       | 0.000 | -16               | 0         | 4         | -0.1       | -0.1       | -0.1       | 0.000        | -1        | 0         |                       |                       |                       |
| Democratic Republic of the Congo | 1580              | -1.8       | -3.2       | -0.1       | 0.074 | -52       | 20                     | 706       | 1.7        | 0.1        | 3.2        | 0.078 | -9                | 50        | 29        | 0.0        | 0.0        | 0.1        | 0.430        | 0         | 2         |                       |                       |                       |
| Ecuador                          | 250               | 0.1        | 0.0        | 0.2        | 0.050 | -1        | 3                      | 94        | -0.1       | -0.2       | 0.1        | 0.334 | -2                | 1         | 34        | -0.1       | -0.1       | 0.0        | 0.122        | -5        | 0         |                       |                       |                       |
| Egypt                            | 3                 | 0.0        | 0.0        | 0.0        | 0.008 | 0         | 1                      | 51        | 0.3        | 0.2        | 0.5        | 0.000 | -4                | 0         | 928       | -0.3       | -0.5       | -0.2       | 0.000        | -16       | 3         |                       |                       |                       |
| Eritrea                          | 0                 | 0.0        | 0.0        | 0.0        | 0.551 | 0         | 0                      | 33        | 0.1        | 0.0        | 0.2        | 0.364 | -2                | 4         | 86        | -0.1       | -0.2       | 0.0        | 0.173        | -4        | 2         |                       |                       |                       |
| Ethiopia                         | 134               | 0.2        | -0.1       | 0.4        | 0.307 | -6        | 10                     | 708       | -0.2       | -0.7       | 0.5        | 0.712 | -18               | 16        | 308       | 0.0        | -0.6       | 0.8        | 0.977        | -12       | 12        |                       |                       |                       |
| Finland                          | 953               | 0.8        | 0.5        | 1.1        | 0.000 | -1        | 21                     | 359       | -0.8       | -1.0       | -0.5       | 0.000 | -18               | 0         | 7         | -0.1       | -0.1       | 0.0        | 0.000        | -1        | 0         |                       |                       |                       |
| France                           | 254               | 10         | 0.3        | 15         | 0.028 | -3        | 25                     | 377       | -0.9       | -1.4       | -0.3       | 0.025 | -23               | 4         | 17        | -0.1       | -0.2       | 0.0        | 0.044        | -2        | 0         |                       |                       |                       |
| Gabon                            | 203               | 0.0        | -0.1       | 0.1        | 1.000 | -2        | 3                      | 58        | 0.0        | -0.1       | 0.1        | 0.691 | -3                | 2         | 5         | 0.0        | 0.0        | 0.1        | 0.011        | 0         | 1         |                       |                       |                       |
| Germany                          | 303               | 1.1        | 0.7        | 1.6        | 0.000 | 0         | 29                     | 244       | -1.1       | -1.4       | -0.6       | 0.001 | -26               | 0         | 9         | -0.1       | -0.1       | -0.1       | 0.001        | -1        | 0         |                       |                       |                       |
| Ghana                            | 55                | 0.1        | 0.0        | 0.2        | 0.201 | -2        | 5                      | 83        | -0.1       | -0.2       | 0.1        | 0.334 | -5                | 2         | 17        | 0.0        | -0.1       | 0.0        | 0.733        | -1        | 1         |                       |                       |                       |
| Greece                           | 18                | 0.4        | 0.3        | 0.5        | 0.000 | 0         | 11                     | 95        | -0.2       | -0.3       | -0.1       | 0.000 | -7                | 2         | 15        | -0.2       | -0.2       | -0.2       | 0.000        | -5        | 0         |                       |                       |                       |
| Guatemala                        | 60                | 0.0        | 0.0        | 0.1        | 0.334 | -6        | 8                      | 45        | 0.0        | -0.1       | 0.1        | 0.670 | -7                | 6         | 2         | 0.0        | 0.0        | 0.0        | 0.000        | -1        | 0         |                       |                       |                       |
| Guinea                           | 53                | 0.4        | 0.3        | 0.5        | 0.000 | 0         | 14                     | 82        | -0.3       | -0.4       | -0.2       | 0.000 | -9                | 1         | 11        | -0.1       | -0.2       | -0.1       | 0.000        | -3        | 0         |                       |                       |                       |
| Guyana                           | 172               | 0.2        | 0.1        | 0.3        | 0.000 | 0         | 5                      | 36        | -0.2       | -0.3       | -0.1       | 0.000 | -5                | 0         | 3         | 0.0        | 0.0        | 0.0        | 0.798        | 0         | 0         |                       |                       |                       |
| Honduras                         | 62                | 0.2        | 0.1        | 0.3        | 0.003 | -2        | 8                      | 50        | -0.2       | -0.2       | -0.1       | 0.006 | -7                | 2         | 2         | 0.0        | 0.0        | 0.0        | 0.000        | 0         | 0         |                       |                       |                       |
| Iceland                          | 5                 | 0.0        | 0.1        | 0.1        | 0.011 | 0         | 1                      | 24        | 0.0        | 0.0        | 0.0        | 0.426 | -1                | 1         | 23        | 0.0        | -0.1       | 0.0        | 0.244        | -1        | 0         |                       |                       |                       |
| India                            | 280               | 2.2        | 1.8        | 2.6        | 0.000 | -4        | 56                     | 2072      | 5.7        | 4.1        | 6.9        | 0.000 | -34               | 99        | 802       | -7.9       | -9.5       | -6.1       | 0.000        | -128      | 5         |                       |                       |                       |
| Indonesia                        | 1295              | 2.0        | 0.0        | 4.0        | 0.105 | -25       | 68                     | 547       | -1.8       | -3.7       | 0.1        | 0.112 | -62               | 24        | 39        | -0.2       | -0.3       | -0.1       | 0.027        | -5        | 3         |                       |                       |                       |
| Iran                             | 34                | 0.1        | 0.0        | 0.1        | 0.005 | 0         | 3                      | 350       | -0.9       | -1.8       | 0.0        | 0.099 | -34               | 22        | 1251      | 0.8        | 0.0        | 1.7        | 0.094        | -22       | 32        |                       |                       |                       |
| Iraq                             | 1                 | 0.0        | 0.0        | 0.0        | 0.000 | 0         | 0                      | 79        | -0.7       | -0.7       | 0.2        | 0.511 | -13               | 6         | 7         | -0.2       | -0.2       | -0.2       | 0.000        | -6        | 0         |                       |                       |                       |
| Italy                            | 64                | 0.8        | 0.6        | 1.0        | 0.000 | -1        | 22                     | 213       | -0.6       | -0.8       | -0.4       | 0.000 | -18               | 2         | 19        | -0.2       | -0.2       | -0.1       | 0.000        | -5        | 1         |                       |                       |                       |
| Japan                            | 367               | 1.5        | 1.1        | 1.9        | 0.000 | -1        | 45                     | 280       | -1.4       | -1.8       | -1.1       | 0.000 | -43               | 1         | 11        | -0.1       | -0.1       | 0.0        | 0.001        | -2        | 1         |                       |                       |                       |
| Kazakhstan                       | 49                | 0.1        | -0.1       | 0.4        | 0.379 | -2        | 7                      | 1472      | -1.7       | -4.3       | 0.4        | 0.256 | -60               | 33        | 1156      | -1.7       | -4.2       | 0.8        | 0.280        | -35       | 59        |                       |                       |                       |
| Kenya                            | 38                | 0.1        | -0.1       | 0.2        | 0.307 | -2        | 5                      | 357       | -0.3       | -1.0       | 0.3        | 0.534 | -12               | 6         | 19        | 0.3        | -0.5       | 1.0        | 0.495        | -6        | 9         |                       |                       |                       |
| Kyrgyzstan                       | 6                 | 0.0        | 0.0        | 0.1        | 0.712 | 0         | 1                      | 27        | 0.2        | 0.1        | 0.3        | 0.000 | -1                | 7         | 59        | -0.2       | -0.4       | -0.1       | 0.000        | -7        | 1         |                       |                       |                       |
| Laos                             | 14                | 0.4        | 0.2        | 0.7        | 0.001 | -2        | 15                     | 85        | -0.4       | -0.7       | -0.2       | 0.001 | -15               | 2         | 3         | 0.0        | 0.0        | 0.0        | 0.650        | 0         | 0         |                       |                       |                       |
| Libya                            | 2                 | 0.0        | 0.0        | 0.0        | 0.712 | 0         | 0                      | 29        | 0.0        | -0.2       | 0.1        | 0.650 | -2                | 2         | 1588      | 0.0        | -0.1       | 0.2        | 0.650        | -2        | 2         |                       |                       |                       |
| Madagascar                       | 155               | -0.7       | -1.0       | -0.4       | 0.000 | -20       | 2                      | 387       | 0.5        | 0.2        | 0.8        | 0.003 | -4                | 16        | 49        | 0.3        | 0.1        | 0.5        | 0.012        | -1        | 9         |                       |                       |                       |
| Malawi                           | 22                | -0.1       | -0.2       | -0.1       | 0.002 | -4        | 0                      | 70        | 0.1        | 0.1        | 0.2        | 0.001 | -6                | 3         | 5         | 0.0        | 0.0        | 0.1        | 0.021        | 0         | 1         |                       |                       |                       |
| Malaysia                         | 243               | 0.6        | 0.2        | 1.0        | 0.000 | 0         | 8                      | 85        | 0.6        | -1.0       | -0.2       | 0.000 | -6                | 3         | 5         | 0.0        | 0.0        | 0.0        | 0.268        | 0         | 0         |                       |                       |                       |
| Mali                             | 30                | 0.2        | 0.1        | 0.2        | 0.000 | 0         | 5                      | 306       | 1.1        | 0.4        | 1.8        | 0.036 | -2                | 41        | 936       | -1.3       | -2.0       | -0.6       | 0.016        | -43       | 1         |                       |                       |                       |
| Mauritania                       | 1                 | 0.0        | 0.0        | 0.0        | 0.776 | 0         | 0                      | 52        | 1.0        | 0.5        | 1.4        | 0.003 | 0                 | 31        | 993       | -1.0       | -1.4       | -0.5       | 0.003        | -31       | 0         |                       |                       |                       |
| Mexico                           | 362               | 1.9        | 0.9        | 2.7        | 0.003 | -9        | 63                     | 185       | -1.9       | -2.8       | -0.8       | 0.003 | -73               | 25        | 396       | 0.2        | -1.3       | 1.8        | 0.691        | -28       | 26        |                       |                       |                       |
| Mongolia                         | 49                | -0.2       | -0.3       | -0.1       | 0.005 | -7        | 2                      | 684       | -1.4       | -2.6       | -0.6       | 0.053 | -43               | 12        | 17        | -0.7       | -0.7       | -0.7       | 0.020        | -9        | 17        |                       |                       |                       |
| Morocco                          | 4                 | 0.0        | 0.0        | 0.0        | 0.551 | 0         | 1                      | 85        | 0.2        | 0.3        | 0.6        | 0.379 | -3                | 7         | 270       | -0.2       | -0.6       | 0.2        | 0.384        | -7        | 3         |                       |                       |                       |
